# Supplementary material for: Animal Histoplasmosis in Europe: Review of the Literature and Molecular Typing of the Etiological Agents
Source: MDPI journal article supplement (doi:10.3390/jof8080833), 2022-08-09
Supplement: s1 [file s1]

**Table S2:** Herein described new primers and PCR conditions

| Gene locus     | Primer name: sequence <sup>a</sup> | Amplicon size (bp) | PCR conditions                                                                                       |
|----------------|------------------------------------|--------------------|------------------------------------------------------------------------------------------------------|
| <i>PRP8</i>    | fw: CTTCAGTCGTTTCCCCTG             | 560                | Initial denaturation step (3min) at 95°C                                                             |
|                | rev: TGCTGCTCTGTAGAAACACT          |                    | DNA denaturation step (15s) at 94°C                                                                  |
|                | fw FFPE: GAAGCCGATGAAATCCAGGG      | 111                | Annealing step (30s) at 65°C (-0.7°C/cycle) for the next 12 cycles, thereafter at 56°C for 20 cycles |
|                | rev FFPE: TATCAGGAGTGCCAACAGGT     |                    | Extension step (60s) at 72°C for 35 cycles (45 cycles for FFPE and fresh biopsy)                     |
| <i>CYP51pA</i> | fw: AGACTACCGTGTTTCTTGGA           | 646                | Final extension step (5min) at 72°C                                                                  |
|                | rev: GCAATCTCGATGTCTGGGA           |                    | Initial denaturation step (3min) at 95°C                                                             |
|                | rev FFPE: TCCATCAGCTTCGAGTTTGG     | 110                | DNA denaturation step (15s) at 95°C                                                                  |
|                |                                    |                    | Annealing step (30s) at 55°C                                                                         |
| <i>CYP51pB</i> | fw: GCACGGCGACATCTTCAC             | 596                | Extension step (60s) at 72°C for 35 cycles (45 cycles for FFPE and fresh biopsy)                     |
|                | rev: CTGGCCGTTCTTGTAAGTGC          |                    | Final extension step (5min) at 72°C                                                                  |
|                | rev FFPE: TACTTGATGAACTTCTTCTGCT   | 170                | Initial denaturation step (3min) at 95°C                                                             |
|                |                                    |                    | DNA denaturation step (15s) at 95°C                                                                  |

<sup>a</sup> All primer sequences are in 5' to 3' configuration. fw: forward; rev: reverse; *PRP8*: *PRP8* intein; *CYP51pA*: cytochrome P450 enzyme lanosterol 14 $\alpha$ -demethylase A; *CYP51pB*: Cytochrome P450 enzyme lanosterol 14 $\alpha$ -demethylase B; FFPE: formalin-fixed paraffin-embedded samples)
