# Supplementary material for: Animal Histoplasmosis in Europe: Review of the Literature and Molecular Typing of the Etiological Agents
Source: MDPI journal article supplement (doi:10.3390/jof8080833), 2022-08-09
Supplement: s1 [file s1]

**Table S3:** Results of the PCRs as well as of the sequencing of the different loci in the different studied materials containing *H. capsulatum*

| sample identifier | clade <sup>a</sup> | sample type | <i>arf</i> |         | <i>H-anti</i> |         | <i>tub1</i> |         | <i>PRP8</i> |       | <i>CYP51pA</i> |       | <i>CYP51pB</i> |       |
|-------------------|--------------------|-------------|------------|---------|---------------|---------|-------------|---------|-------------|-------|----------------|-------|----------------|-------|
|                   |                    |             | long*      | short** | long*         | short** | long*       | short** | long        | short | long           | short | long           | short |
| 2009-I            | Eurasia (new)      | cadaveric   | pos.       | n.a.    | pos.          | n.a.    | pos.        | n.a.    | pos.        | n.a.  | pos.           | n.a.  | pos.           | n.a.  |
| 2010-I            | Eurasia (new)      | FFPE        | pos.       | n.a.    | pos.          | n.a.    | pos.        | n.a.    | n.a.        | pos.  | n.a.           | pos.  | n.a.           | pos.  |
| 2010-II           | Eurasia (new)      | FFPE        | n.a.       | pos.    | n.a.          | pos.    | n.a.        | pos.    | n.a.        | pos.  | n.a.           | pos.  | n.a.           | pos.  |
| 2011-I            | Eurasia (new)      | FFPE        | pos.       | n.a.    | pos.          | n.a.    | pos.        | n.a.    | n.a.        | pos.  | n.a.           | pos.  | n.a.           | pos.  |
| 2012-I            | Eurasia (new)      | FFPE        | n.a.       | pos.    | n.a.          | pos.    | n.a.        | pos.    | n.a.        | pos.  | n.a.           | pos.  | n.a.           | pos.  |
| 2014-I            | Eurasia (new)      | FFPE        | n.a.       | pos.    | n.a.          | pos.    | n.a.        | pos.    | n.a.        | pos.  | n.a.           | pos.  | n.a.           | sf    |
| 2014-II           | Eurasia (new)      | FFPE        | n.a.       | pos.    | n.a.          | pos.    | n.a.        | pos.    | n.a.        | pos.  | n.a.           | pos.  | n.a.           | pos.  |
| 2015-I            | Eurasia            | FFPE        | n.a.       | pos.    | n.a.          | neg.    | n.a.        | pos.    | n.a.        | pos.  | n.a.           | sf    | n.a.           | sf    |
| 2017-I            | Eurasia            | FFPE        | n.a.       | pos.    | n.a.          | neg.    | n.a.        | neg.    | n.a.        | pos.  | n.a.           | pos.  | n.a.           | pos.  |
| 2018-I            | Eurasia (new)      | FFPE        | pos.       | n.a.    | pos.          | n.a.    | pos.        | n.a.    | pos.        | n.a.  | pos.           | n.a.  | pos.           | n.a.  |
| 2018-II           | Eurasia (new)      | FFPE        | pos.       | n.a.    | pos.          | n.a.    | pos.        | n.a.    | pos.        | n.a.  | pos.           | n.a.  | pos.           | n.a.  |
| 2020-I            | Eurasia (new)      | FFPE        | pos.       | n.a.    | pos.          | n.a.    | pos.        | n.a.    | pos.        | n.a.  | pos.           | n.a.  | pos.           | n.a.  |
| 2021-I            | Eurasia (new)      | cadaveric   | pos.       | n.a.    | pos.          | n.a.    | pos.        | n.a.    | pos.        | n.a.  | pos.           | n.a.  | pos.           | n.a.  |
| 2021-II           | Eurasia            | FFPE        | neg.       | pos.    | neg.          | neg.    | neg.        | pos.    | neg.        | pos.  | neg.           | pos.  | neg.           | pos.  |
| CBS 136.72        | Nam2               | isolate     | pos.       | n.a.    | pos.          | n.a.    | pos.        | n.a.    | pos.        | n.a.  | pos.           | n.a.  | pos.           | n.a.  |
| CBS 477.64        | Eurasia (new)      | isolate     | pos.       | n.a.    | pos.          | n.a.    | pos.        | n.a.    | pos.        | n.a.  | pos.           | n.a.  | pos.           | n.a.  |
| CBS 478.64        | Eurasia (new)      | isolate     | pos.       | n.a.    | pos.          | n.a.    | pos.        | n.a.    | pos.        | n.a.  | pos.           | n.a.  | pos.           | n.a.  |

*arf*: ADP-ribosylation factor; *H-anti*: H antigen precursor; *tub1*: alpha-tubulin; *PRP8*: PRP8 intein; *CYP51pA*: cytochrome P450 enzyme lanosterol 14 $\alpha$ -demethylase A; *CYP51pB*: Cytochrome P450 enzyme lanosterol 14 $\alpha$ -demethylase B; \*as described by Kasuga; \*\*as described by Arunmorzhi Balajee; FFPE: formalin-fixed paraffin-embedded samples; pos.: the PCR, as well as the sequencing of the amplicon succeeded; neg.: The PCR was negative; sf: the PCR succeeded, but the sequencing of the amplicon failed; n.a.: not applicable, as the corresponding PCR was not done. In yellow are indicated the samples which could be included in all phylogenetic trees (Figure 3a, 3b, 4a and 4b), in orange those which could be included in the phylogenetic analyses in the short fashion (Figure 3b and 4b).
