# Supplementary material for: Animal Histoplasmosis in Europe: Review of the Literature and Molecular Typing of the Etiological Agents
Source: MDPI journal article supplement (doi:10.3390/jof8080833), 2022-08-09
Supplement: s1 [file s1]

**Table S1:** Accession numbers of gene loci amplified from tissue samples of animal with histoplasmosis and of reference isolates reported in this study as well as the localization of them within the published whole genome sequences

| Identifier | other names                | origin         | <i>arf</i>                            | <i>H-anti</i>                               | <i>tub</i>                                 | <i>PRP8</i>                               | <i>cyp51pA</i>                              | <i>cyp51pB</i>                             |
|------------|----------------------------|----------------|---------------------------------------|---------------------------------------------|--------------------------------------------|-------------------------------------------|---------------------------------------------|--------------------------------------------|
| CBS 136.72 | n.a.                       | soil (USA)     | OM837779                              | OM816641                                    | OM869470                                   | OM731540                                  | OM816659                                    | OM675767                                   |
| CBS 477.64 | H174                       | horse (Poland) | OM837785                              | OM816648                                    | OM869477                                   | OM731547                                  | OM816666                                    | OM675774                                   |
| CBS 478.64 | H175                       | horse (Poland) | OM837786                              | OM816649                                    | OM869478                                   | OM731548                                  | OM816667                                    | OM675775                                   |
| Tmu        | n.a.                       | human          | AMXR01000497.1 (6836-7316) contig_511 | AMXR01007615.1 (17 738- 18 172) contig_7912 | AMXR01008776.1 (15 914-16 219) contig_9148 | AMXR01000209.1 (11 645-11 077) contig_218 | AMXR01010037.1 (12 362-13 007) contig_10501 | AMXR01008275.1 (18 251-18 859) contig_8641 |
| H88        | ATCC32281/2438/RV26821     | human          | Kasuga, 2003                          | Kasuga, 2003                                | Kasuga, 2003                               | DS990639 (2 658 737- 2 659 296)           | DS990645 (403 243- 403 888)                 | DS990639 (2 387 790-2 388385)              |
| H143       | 4719/CBS 287.54            | human          | Kasuga, 2003                          | Kasuga, 2003                                | Kasuga, 2003                               | JX274641                                  | GG692438 (397 218- 397 803)                 | GG692421 (1 851 111- 1 851 706)            |
| G186AR     | H82                        | human          | Kasuga, 2003                          | Kasuga, 2003                                | Kasuga, 2003                               | GCA_017355575.1 (1 557 354-1 557 910)     | GG663383 (81 075- 81714)                    | GG663363 (1 288 426-1 289 021)             |
| G217B      | H8/ATCC26032/1001/IFM41659 | human          | Kasuga, 2003                          | Kasuga, 2003                                | Kasuga, 2003                               | HISTO_FE.Contig19 (886 708-887 264)       | HISTO_GB.Contig114 (91 444-92 086)          | HISTO_ZL.Contig1161 (480 730-481 325)      |
| Nam1       | n.a.                       | unknown        | CH476655 (648 6055-648 6516)          | CH476655 (626 230- 626 638)                 | CH476655                                   | CH476658 (1 871 717- 1 872 276)           | CH476658 (84 405- 85 050)                   | CH476658 (1 586 773- 1 587 367)            |
| 2009-I     | n.a.                       | badger         | OM837780                              | OM816642                                    | OM869471                                   | OM731541                                  | OM816660                                    | OM675758                                   |
| 2014-I     | n.a.                       | badger         | OM837774                              | OM816638                                    | OM869465                                   | OM731535                                  | OM816653                                    | n.a.                                       |
| 2015-I     | n.a.                       | badger         | OM837776                              | n.a.                                        | OM869467                                   | n.a.                                      | OM816655                                    | n.a.                                       |
| 2021-I     | n.a.                       | badger         | OM914585                              | OM816640                                    | OM869469                                   | OM731539                                  | OM816658                                    | OM675766                                   |
| 2010-II    | n.a.                       | cat            | OM837773                              | OM816636                                    | OM869463                                   | OM731533                                  | OM816651                                    | OM675761                                   |
| 2014-II    | n.a.                       | cat            | OM837775                              | OM816639                                    | OM869466                                   | OM731536                                  | OM816654                                    | OM675763                                   |
| 2017-I     | n.a.                       | cat            | OM837777                              | n.a.                                        | n.a.                                       | OM731537                                  | OM816656                                    | OM675764                                   |
| 2018-I     | n.a.                       | cat            | OM837783                              | OM816645                                    | OM869474                                   | OM731544                                  | OM816663                                    | OM675771                                   |
| 2018-II    | n.a.                       | cat            | OM914586                              | OM816646                                    | OM869475                                   | OM731545                                  | OM816664                                    | OM675772                                   |

|         |      |        |          |          |          |          |          |          |
|---------|------|--------|----------|----------|----------|----------|----------|----------|
| 2020-I  | n.a. | cat    | OM837784 | OM816647 | OM869476 | OM731546 | OM816665 | OM675773 |
| 2012-I  | n.a. | cat    | OM914584 | OM816637 | OM869464 | OM731534 | OM816652 | OM675762 |
| 2010-I  | n.a. | cat    | OM837781 | OM816643 | OM869472 | OM731542 | OM816661 | OM675769 |
| 2011-I  | n.a. | cat    | OM837782 | OM816644 | OM869473 | OM731543 | OM816662 | OM675770 |
| 2021-II | n.a. | badger | OM837778 | n.a.     | OM869468 | OM731538 | OM816657 | OM675765 |

n.a.: not applicable
